# Supplementary material
Source: Elsevier journal article supplement (https://comptes-rendus.academie-sciences.fr/chimie/article/10.1016/j.crci.2012.04.003/file/attach/mmc2.pdf)

# checkCIF/PLATON report

No syntax errors found. CIF dictionary Interpreting this report

## Datablock: jml45

---

Bond precision: C-C = 0.0113 A

Wavelength=0.71073

Cell: a=13.8646(10) b=14.0687(12) c=14.3634(10)  
alpha=99.049(6) beta=118.343(6) gamma=106.634(6)  
Temperature: 200 K

|                | Calculated                      | Reported                        |
|----------------|---------------------------------|---------------------------------|
| Volume         | 2215.3(4)                       | 2215.2(3)                       |
| Space group    | P -1                            | P -1                            |
| Hall group     | -P 1                            | -P 1                            |
| Moiety formula | C76 H94 Mn6 N12 O22, 2(C H Cl3) | C76 H94 Mn6 N12 O22, 2(C H Cl3) |
| Sum formula    | C78 H96 Cl6 Mn6 N12 O22         | C78 H96 Cl6 Mn6 N12 O22         |
| Mr             | 2096.01                         | 2096.01                         |
| Dx,g cm-3      | 1.571                           | 1.571                           |
| Z              | 1                               | 1                               |
| Mu (mm-1)      | 1.088                           | 1.088                           |
| F000           | 1076.0                          | 1076.0                          |
| F000'          | 1079.30                         |                                 |
| h,k,lmax       | 18,18,18                        | 18,18,18                        |
| Nref           | 10172                           | 10108                           |
| Tmin,Tmax      | 0.866,0.917                     | 0.613,0.917                     |
| Tmin'          | 0.813                           |                                 |

Correction method= MULTI-SCAN

Data completeness= 0.994

Theta(max)= 27.500

R(reflections)= 0.0725( 5800)

wR2(reflections)= 0.2130( 10108)

S = 1.036

Npar= 567

---

The following ALERTS were generated. Each ALERT has the format  
**test-name\_ALERT\_alert-type\_alert-level**.  
Click on the hyperlinks for more details of the test.

---

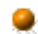

### Alert level B

PLAT220\_ALERT\_2\_B Large Non-Solvent C Ueq(max)/Ueq(min) ... 4.23 Ratio

---

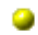

### Alert level C

PLAT341\_ALERT\_3\_C Low Bond Precision on C-C Bonds (x 1000) Ang .. 11

PLAT360\_ALERT\_2\_C Short C(sp3)-C(sp3) Bond C28 - C29 ... 1.42 Ang.  
PLAT234\_ALERT\_4\_C Large Hirshfeld Difference C28 -- C29 .. 0.18 Ang.  
PLAT244\_ALERT\_4\_C Low 'Solvent' Ueq as Compared to Neighbors of C39

---

● **Alert level G**

PLAT072\_ALERT\_2\_G SHELXL First Parameter in WGHT Unusually Large. 0.11  
PLAT860\_ALERT\_3\_G Note: Number of Least-Squares Restraints ..... 1  
PLAT154\_ALERT\_1\_G The su's on the Cell Angles are Equal (x 10000) 600 Deg.

---

0 **ALERT level A** = In general: serious problem  
1 **ALERT level B** = Potentially serious problem  
4 **ALERT level C** = Check and explain  
3 **ALERT level G** = General alerts; check

1 ALERT type 1 CIF construction/syntax error, inconsistent or missing data  
3 ALERT type 2 Indicator that the structure model may be wrong or deficient  
2 ALERT type 3 Indicator that the structure quality may be low  
2 ALERT type 4 Improvement, methodology, query or suggestion  
0 ALERT type 5 Informative message, check

---

---

### Publication of your CIF in IUCr journals

**A basic structural check has been run on your CIF. These basic checks will be run on all CIFs submitted for publication in IUCr journals (*Acta Crystallographica*, *Journal of Applied Crystallography*, *Journal of Synchrotron Radiation*); however, if you intend to submit to *Acta Crystallographica Section C* or *E*, you should make sure that full publication checks are run on the final version of your CIF prior to submission.**

### Publication of your CIF in other journals

**Please refer to the *Notes for Authors* of the relevant journal for any special instructions relating to CIF submission.**

---

**PLATON version of 29/06/2010; check.def file version of 26/06/2010**

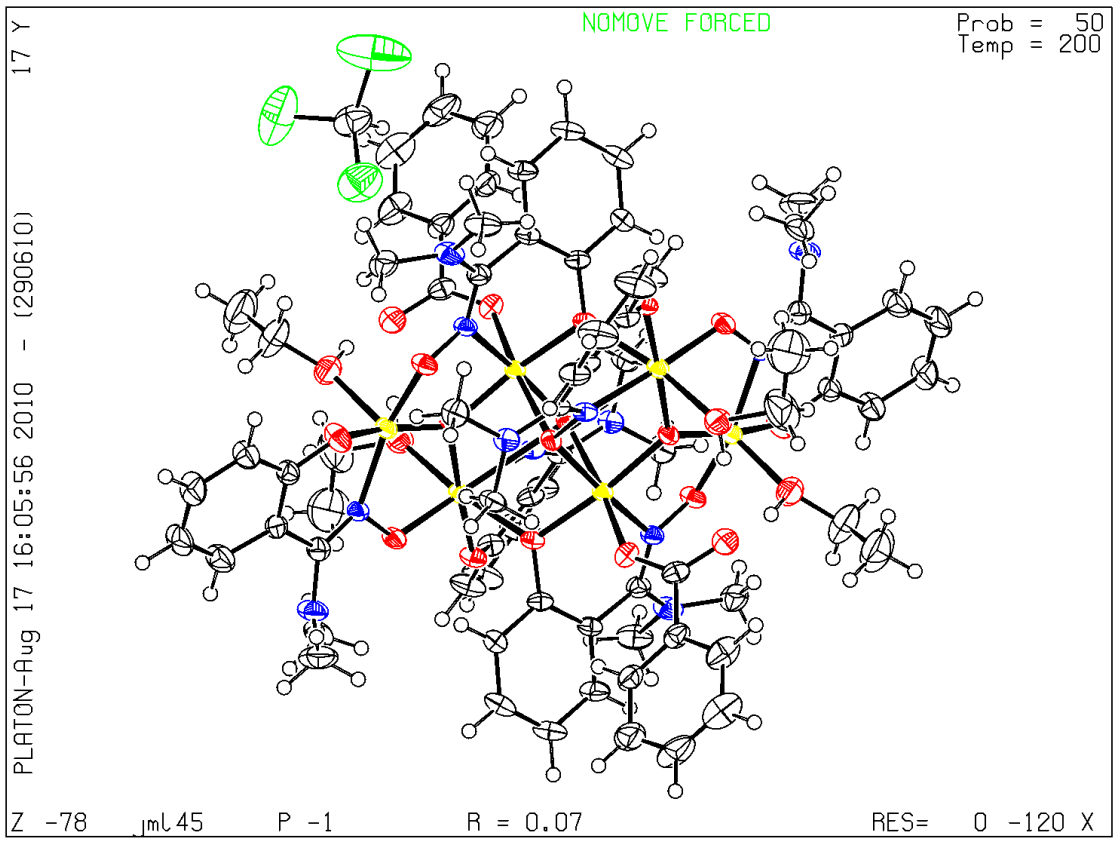

Supplement: mmc2 [file mmc2.pdf]
